# Supplementary material for: Eosinophils, but Not Type 2 Innate Lymphoid Cells, Are the Predominant Source of Interleukin 4 during the Innate Phase of Leishmania major Infection
Source: MDPI journal article supplement (doi:10.3390/pathogens11080828), 2022-07-25
Supplement: s1 [file s1]

## C57BL/6

viable CD45<sup>+</sup>SiglecF<sup>-</sup>

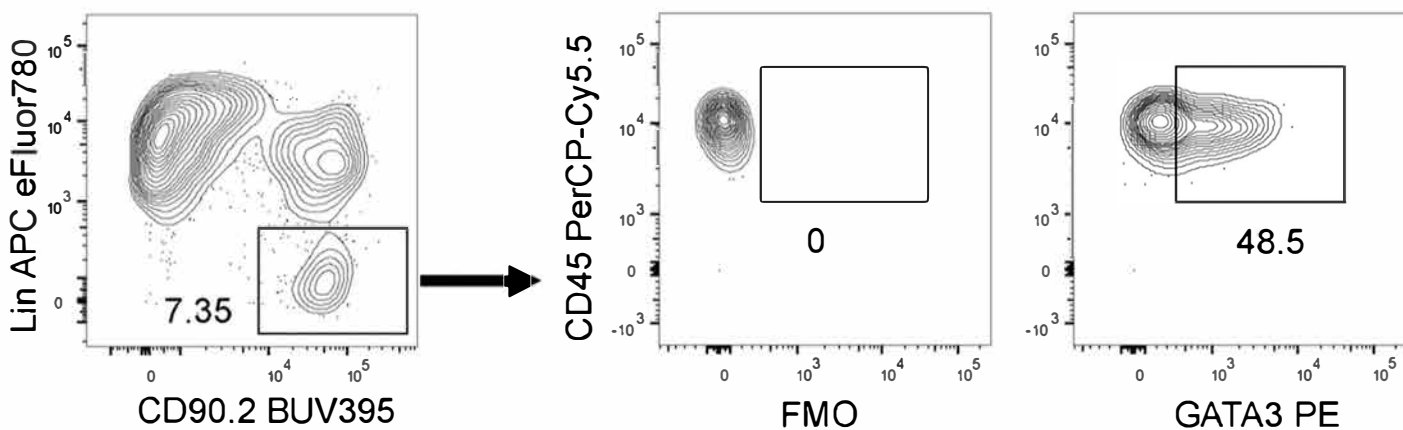

## BALB/c

viable CD45<sup>+</sup>SiglecF<sup>-</sup>

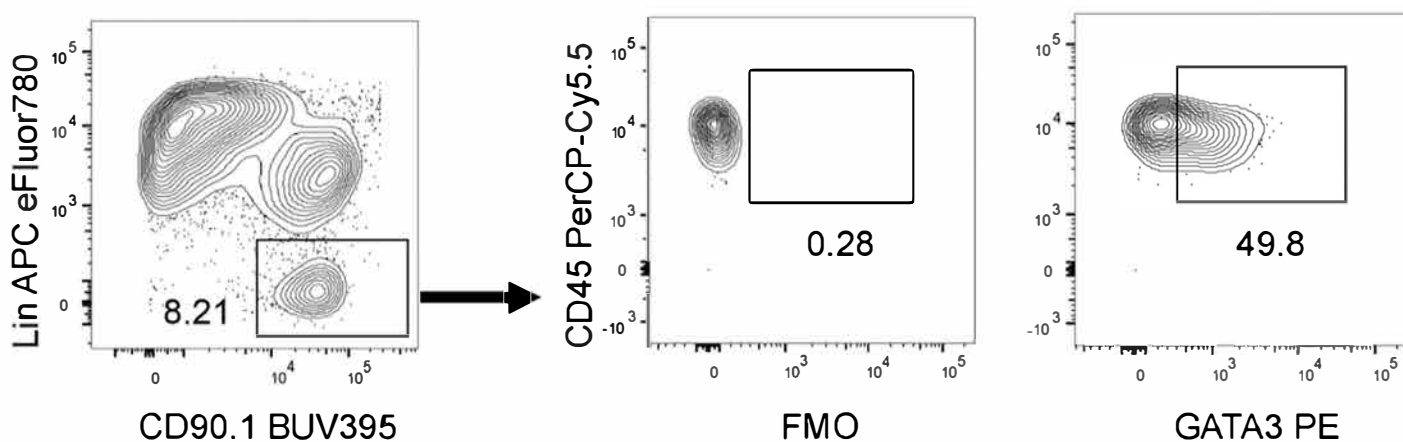

**Supplemental Figure S1. Detection of GATA3 in CD45<sup>+</sup>CD90<sup>+</sup>Lin<sup>-</sup> ILC2 population in the ear skin of naïve C57BL/6 and BALB/c mice.** Flow cytometry of ear skin cells from naïve C57BL/6 and BALB/c mice. Lymphomononuclear cells were isolated from ear dermis and epidermis by enzymatic and mechanical dissociation. Single cells were pre-gated on viability and CD45 expression; eosinophils staining positively for SiglecF were excluded. ILC2 were defined as lineage marker-negative, CD90<sup>+</sup> cells. To further verify the ILC2 phenotype, intracellular staining of the transcription factor GATA3 was performed. Data is representative of 2 (C57BL/6) or 5 (BALB/c) experiments with 3 to 5 mice pooled per group. The lineage marker-mix included antibodies directed against CD2, CD3, CD5, CD11b, CD11c, CD19, FcεR1a, Ly6G, NKp46 and Ter119. The numbers indicate the percentage of the gated population.
